# Supplementary material for: Investigation of the Performance of a Sb2S3-Based Solar Cell with a Hybrid Electron Transport Layer (h-ETL): A Simulation Approach Using SCAPS-1D Software
Source: Hindawi journal article supplement (doi:10.1155/2024/5188636), 2024-04-08
Supplement: f1 [file 5188636.f1.docx]

*Investigation of the performance of a Sb2S3-based solar cell with a hybrid electron transport layer (h-ETL): A simulation approach using SCAPS-1D software*

**Pierre Gérard Darel Kond Ngue,1 Ariel Teyou Ngoupo,1,* Aimé Magloire Ntouga Abena,1 François Xavier Abomo Abega,2 and Jean-Marie Bienvenu Ndjaka1**

*1University of Yaoundé I, Faculty of Science, Department of Physics, PO Box: 812, Yaoundé, Cameroon*

*2University of Ebolowa, Higher Institute of Agriculture, Forestry, Water and Environment (HIAFWE), PO Box: 118, Ebolowa, Cameroon*

**Corresponding author: A. Teyou Ngoupo* ([*arielteyou@yahoo.fr*](mailto:arielteyou@yahoo.fr))

# Supporting Information

*Figure S1: Energy band diagrams of Sb2S3-based solar cell associated with different ETL materials: (a) CdS, (b) Cd0.5Zn0.5S, (c) IGZO, (d) PCBM.*

*Figure S2: Generation profile (a) and recombination profile (b) of the Sb2S3-based solar cell for different ETL materials.*

*Figure S3: Main junction electric field variation of a Sb2S3-based solar cell for different ETL materials.*

*Figure S4:* *Normalized electrical parameters of FTO/(ZnO/TiO2)/Sb2S3/Spiro-OMeTAD/Au and FTO/(ZnO/IGZO)/Sb2S3/MoO3/Ni solar cells as function of operating temperature.*

*Table S1:* *Solar cell short-circuit current density JSC (mA/cm²) parameter for different ETL-HTL material combinations*.

| ETL | HTL | | | | |
| --- | --- | --- | --- | --- | --- |
| CuSCN | MoO3 | Cu2O | CuI | MASnBr3 |
| IGZO | 15.296312 | 15.337623 | 15.025927 | 15.174194 | 15.020374 |
| PCBM | 15.536339 | 16.180469 | 15.352701 | 14.345186 | 15.825823 |
| Cd0.5Zn0.5S | 16.044905 | 16.068431 | 15.751713 | 15.887190 | 15.739003 |
| CdS | 16.371382 | 16.366427 | 16.067603 | 16.178557 | 16.034639 |

*Table* *S2*: *Solar cell open-circuit voltage VOC (V)* *parameter for different ETL-HTL material combinations.*

| ETL | HTL | | | | |
| --- | --- | --- | --- | --- | --- |
| MASnBr3 | MoO3 | Cu2O | CuSCN | CuI |
| CdS | 0.5843 | 0.5842 | 0.5980 | 0.6028 | 0.6503 |
| Cd0.5Zn0.5S | 0.6668 | 0.6673 | 0.6731 | 0.6760 | 0.7156 |
| IGZO | 0.7425 | 0.7431 | 0.7466 | 0.7484 | 0.7643 |
| PCBM | 0.7690 | 0.7692 | 0.7777 | 0.7809 | 0.8174 |

*Table S3*: *Solar cell fill factor FF (%) parameter for different ETL-HTL material combinations.*

| ETL | HTL | | | | |
| --- | --- | --- | --- | --- | --- |
| CuSCN | MoO3 | Cu2O | CuI | MASnBr3 |
| IGZO | 64.54 | 53.53 | 54.79 | 55.38 | 53.50 |
| CdS | 54.65 | 56.56 | 54.98 | 51.25 | 56.34 |
| Cd0.5Zn0.5S | 56.18 | 55.90 | 56.18 | 53.45 | 55.86 |
| PCBM | 55.05 | 65.31 | 64.56 | 60.59 | 65.09 |

*Table* S4: *Solar cell efficiency η (%) parameter for different ETL-HTL material combinations.*

| ETL | HTL | | | | |
| --- | --- | --- | --- | --- | --- |
| CuI | Cu2O | MASnBr3 | CuSCN | MoO3 |
| CdS | 5.39 | 5.28 | 5.28 | 5.39 | 5.41 |
| Cd0.5Zn0.5S | 6.08 | 5.96 | 5.86 | 6.09 | 5.99 |
| PCBM | 6.49 | 6.54 | 6.51 | 6.68 | 6.66 |
| IGZO | 7.03 | 7.24 | 7.26 | 7.39 | 7.44 |

***Table S5: Sb2S3 solar cell electrical parameters as a function of back metal contact.***

| *Back contact* | *(eV)* | *(eV)* | *JSC (mA/cm2)* | *VOC (V)* | *FF (%)* | *η (%)* |
| --- | --- | --- | --- | --- | --- | --- |
| *Iron (Fe)* | *4.81* | *0.69* | *18.51* | *0.87* | *67.50* | *10.90* |
| *Copper (Cu)* | *4.90* | *0.6* | *18.51* | *0.95* | *69.51* | *12.35* |
| *Molybdenum (Mo)* | *5.0* | *0.5* | *18.51* | *1.05* | *71.45* | *13.96* |
| *Nickel (Ni)* | *5.1* | *0.4* | *18.51* | *1.11* | *74.76* | *15.43* |
| *Gold (Au)* | *5.2* | *0.3* | *18.51* | *1.12* | *77.18* | *16.01* |
| *Palladium (Pd)* | *5.48* | *0.02* | *18.51* | *1.12* | *77.30* | *16.03* |
| *Platinum (Pt)* | *5.75* | *-0.25* | *18.52* | *1.12* | *77.30* | *16.05* |

***Table S6: Thermal coefficient (TC) and associated efficiency (η) of a Sb2S3-based solar as a function of a rear contact nature.***

| Domain | Back contact | (eV) | η (%) | ***TC*** (%/K) |
| --- | --- | --- | --- | --- |
| (i) | *Iron (Fe)* | *4.81* | *10.90* | *0.078* |
| *Copper (Cu)* | *4.9* | *12.35* | *0.066* |
| *Molybdenum (Mo)* | *5.0* | *13.96* | *0.038* |
| (ii) | *Gold (Au)* | *5.2* | *16.01* | *-0.086* |
| *Palladium (Pd)* | *5.48* | *16.03* | *-0.088* |
| *Platinum (Pt)* | *5.75* | *16.05* | *-0.088* |
| (iii) | *Nickel (Ni)* | *5.1* | *15.43* | *-0.043* |
